# Supplementary material for: High glycemic variability is associated with a reduced T cell cytokine response to influenza A virus
Source: PubMed Central journal article supplement — iScience. 2024 Oct 11;27(11):111166. doi: 10.1016/j.isci.2024.111166 (PMC11550119; doi:10.1016/j.isci.2024.111166), 2024-10-11
Supplement: mmc1.pdf [file mmc1.pdf]

## **Supplemental information**

### **High glyceimic variability is associated with a reduced T cell cytokine response to influenza A virus**

**Marcus Z.W. Tong, Katina D. Hulme, Soi Cheng Law, Ellesandra Noye, Emily S. Dorey, Keng Yih Chew, Louise C. Rowntree, Carolien E. van de Sandt, Katherine Kedzierska, Marco Goeijenbier, Katharina Ronacher, Fawaz Alzaid, Jean-Baptiste Julla, Jean-Pierre Riveline, Katie E. Lineburg, Corey Smith, Emma J. Grant, Stephanie Gras, Linda A. Gallo, Helen L. Barrett, and Kirsty R. Short**

**Supplementary Table 1: Patient medication usage (excluding those associated with diabetes management)**

| Low Glycaemic Variability (n = 13) | High Glycaemic variability (n = 19) |
|------------------------------------|-------------------------------------|
| Estelle 35 (1/13)                  | Gabapentin (1/19)                   |
| Ryaltris (1/13)                    | Thyroxine (1/19)                    |
| Rosuvastatin (1/13)                | Salbutamol (1/19)                   |
| Ramipril (2/13)                    | Cefalexin (1/19)                    |
| Fluoxetine (3/13)                  | Levelen (1/19)                      |
| Finasteride (1/13)                 | Atorvastatin (1/19)                 |
| Doxycycline (1/13)                 | Perindopril/indapamide (1/19)       |
| Femtab 2100 (1/13)                 | Amlodipine (1/19)                   |
| Ventolin (1/13)                    | Fluvoxamine (1/19)                  |
| Flixotide (1/13)                   | Pantoprazole (1/19)                 |
| Implanon (1/13)                    | Unspecified contraceptive (1/19)    |

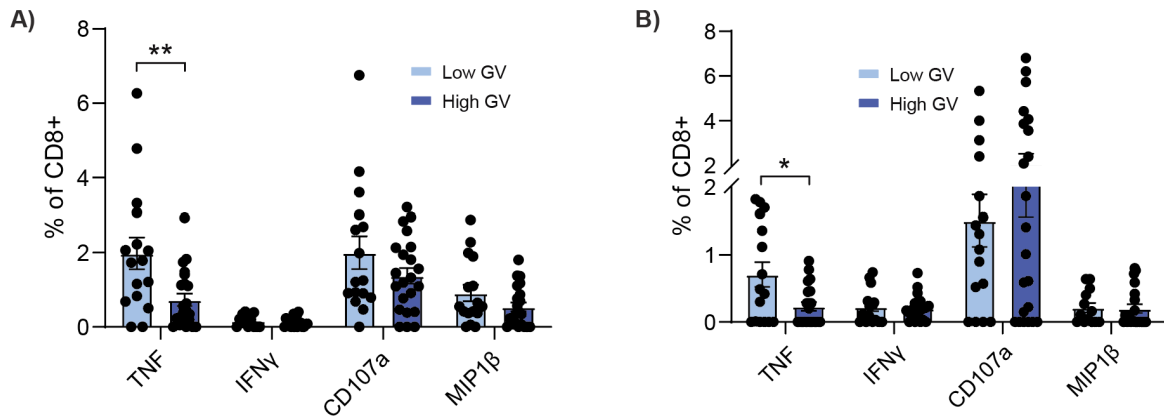

**Supplementary Fig. 1: Participants with higher GV exhibit a reduced percentage of TNF<sup>+</sup>CD8<sup>+</sup> T-cells.** PBMC from participants living with T1D and who were virus were stimulated with **A)** HKx31 (MOI10) or **B)** influenza peptide pool for 18 hours. PBMC were stained for surface markers CD4 and CD8, and activation markers CD107a, IFN $\gamma$ , MIP-1 $\beta$  and TNF. Statistical significance was determined as described in the Materials and Methods. Bars and error bars represent means ( $\pm$ SEM). Gating was performed as previously described<sup>10</sup>. \*:  $p < 0.05$ .

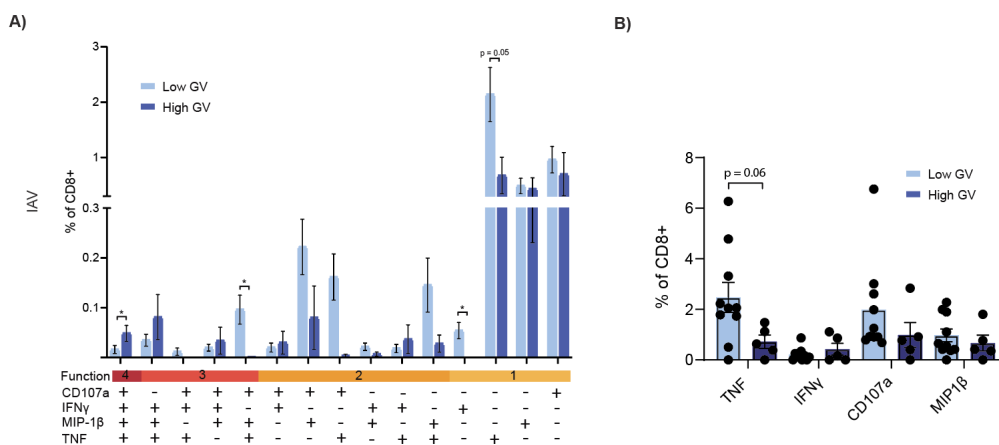

**Supplementary Fig. 2: Participants with higher GV and influenza vaccination history exhibit altered CD8 T-cell derived cytokines.** PBMC from participants living with T1D and who were vaccinated against influenza virus were stimulated with HKx31 (MOI10) for 18 hours. PBMC were stained for surface markers CD4 and CD8, and activation markers CD107a, IFN $\gamma$ , MIP-1 $\beta$  and TNF. **A)** Subsets of cytokine producing CD8<sup>+</sup> T-cells. **B)** Percentage of total cytokine CD8<sup>+</sup> T-cells. Statistical significance was determined as described in the Materials and Methods. Bars and error bars represent means ( $\pm$ SEM). Gating was performed as previously described<sup>10</sup>. \*:  $p < 0.05$ .
